# Supplementary material for: Greenland Ice Sheet late-season melt: Investigating multi-scale drivers of K-transect events
Source: Copernicus journal article supplement (doi:10.5194/tc-2018-285), 2019-01-02
Supplement: Supplementary file 1 [file tc-2018-285-supplement.pdf]

5

## **Greenland Ice Sheet late-season melt: Investigating multi-scale drivers of K-transect events**

10 Thomas J. Ballinger<sup>1</sup>, Thomas L. Mote<sup>2</sup>, Kyle Mattingly<sup>2</sup>, Angela C. Bliss<sup>3</sup>, Edward Hanna<sup>4</sup>, Dirk van As<sup>5</sup>, Melissa Prieto<sup>1</sup>, Saeideh Gharehchahi<sup>1</sup>, Xavier Fettweis<sup>6</sup>, Brice Noël<sup>7</sup>, Paul C.J.P. Smeets<sup>7</sup>, Mads H. Ribergaard<sup>8</sup>, and John Cappelen<sup>8</sup>

*Correspondence to:* Thomas J. Ballinger (tballinger@txstate.edu)

15 <sup>1</sup>Department of Geography, Texas State University, San Marcos, TX, USA

<sup>2</sup>Department of Geography, University of Georgia, Athens, GA, USA

<sup>3</sup>College of Earth, Ocean, and Atmospheric Sciences, Oregon State University, Corvallis, OR, USA

<sup>4</sup>School of Geography and Lincoln Centre for Water and Planetary Health, University of Lincoln, Lincoln, UK

<sup>5</sup>Geological Survey of Denmark and Greenland, Copenhagen, Denmark

20 <sup>6</sup>Laboratory of Climatology, Department of Geography, University of Liège, Liège, Belgium

<sup>7</sup>Institute for Marine and Atmospheric Research, Utrecht University, Utrecht, the Netherlands

<sup>8</sup>Danish Meteorological Institute, Copenhagen, Denmark

Manuscript submitted to *The Cryosphere Discussions* on 19 December 2018

25 **Supplemental Material**

| Year | DOA [d=0]    | DOA Anomaly (d) | DOA [-60,-31]   | DOA [-30,-1]    |
|------|--------------|-----------------|-----------------|-----------------|
| 2011 | 30 Oct (303) | -10.65          | 31 Aug – 29 Sep | 30 Sep – 29 Oct |
| 2012 | 17 Nov (322) | 8.01            | 18 Sep – 17 Oct | 18 Oct – 16 Nov |
| 2013 | 13 Nov (317) | 3.10            | 14 Sep – 13 Oct | 14 Oct – 12 Nov |
| 2014 | 21 Nov (325) | 11.65           | 22 Sep – 21 Oct | 22 Oct – 20 Nov |
| 2015 | 12 Nov (316) | 2.25            | 13 Sep – 12 Oct | 13 Oct – 11 Nov |

26

27 **Table S1.** Dates of sea ice advance (DOA) with the day of year (DOY) in parentheses, the date anomaly with  
 28 respect to the 1981-2010 mean, and annual date windows preceding DOA, 2011-2015.

29

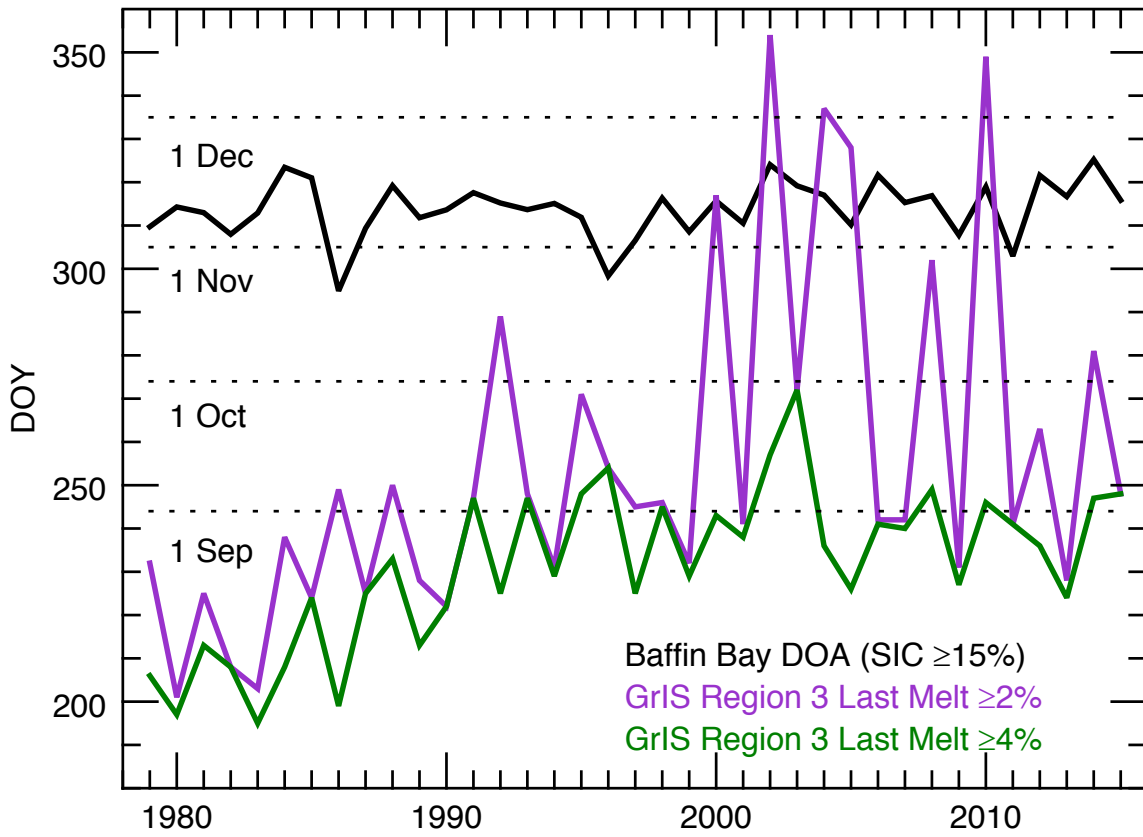

31  
32  
33  
34  
35  
36

**Figure S1.** Passive microwave-derived time series, 1979-2015, of the Baffin Bay sea ice date of advance (DOA) and date marking the beginning of the last 3-day period of at least 2% and 4% melt over Region 3 (see inset in **Fig. 1**) of the Greenland Ice Sheet (GrIS).

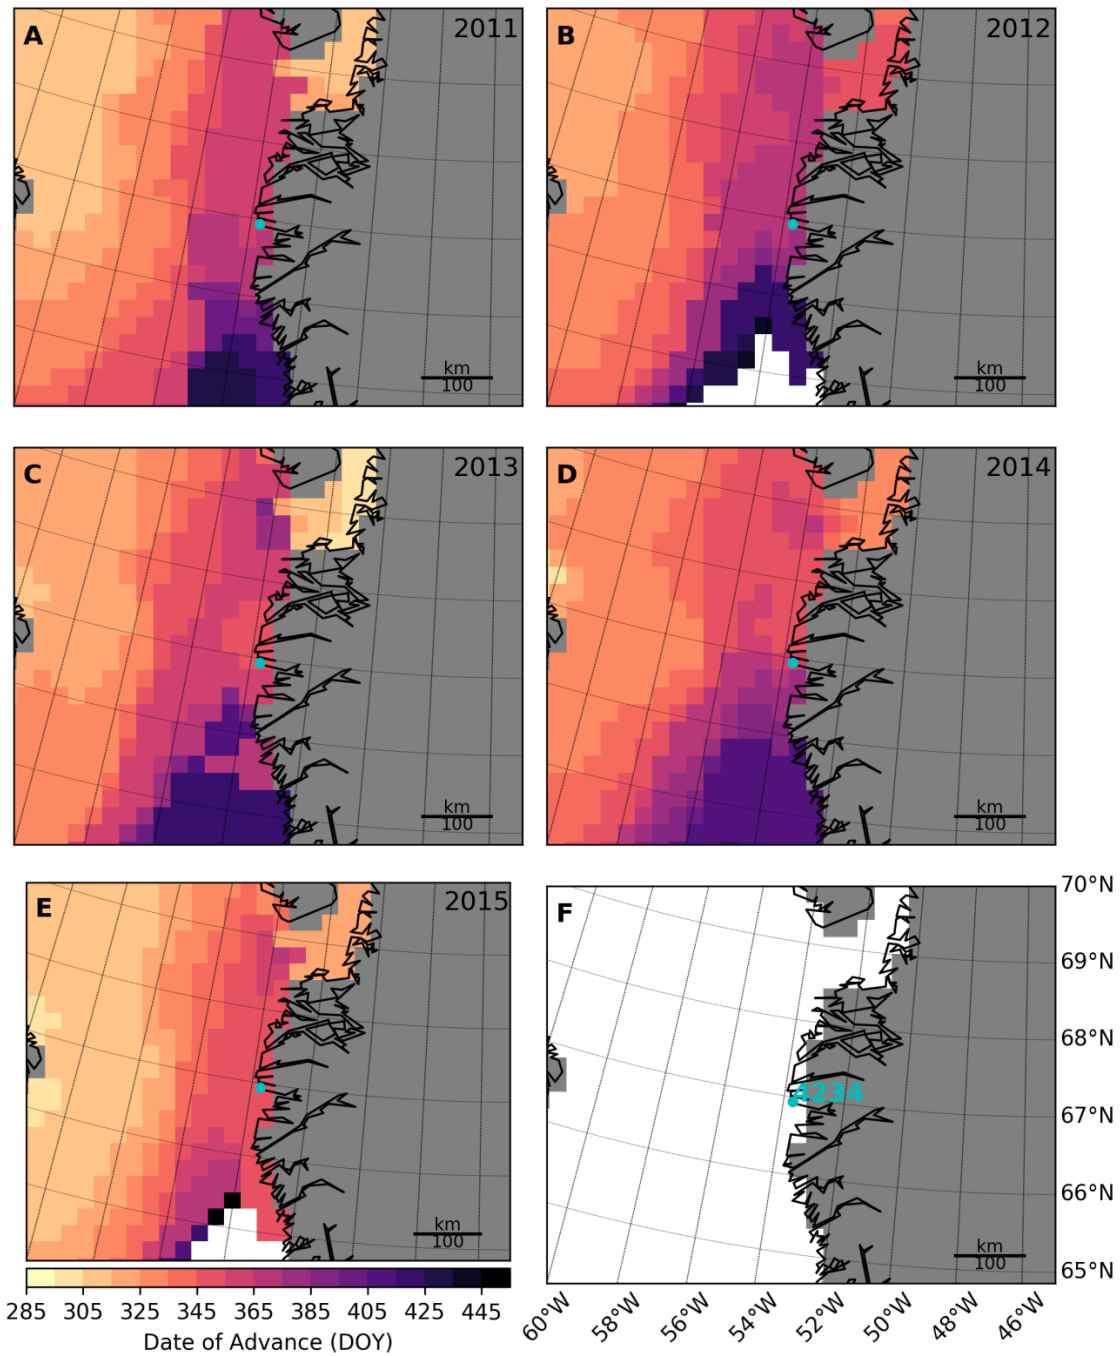

37  
38  
39  
40  
41  
42

**Figure S2.** Maps of Baffin Bay DOA for a-e) 2011-2015. The location of Sisimiut (WMO code 4234) is marked in cyan, white indicates locations where no DOA was observed and grey indicates land. Panel f) shows reference grid coordinates for maps a-e. DOY after 365 (or 366 in 2012) indicates that DOA occurs after 1 January the following year.

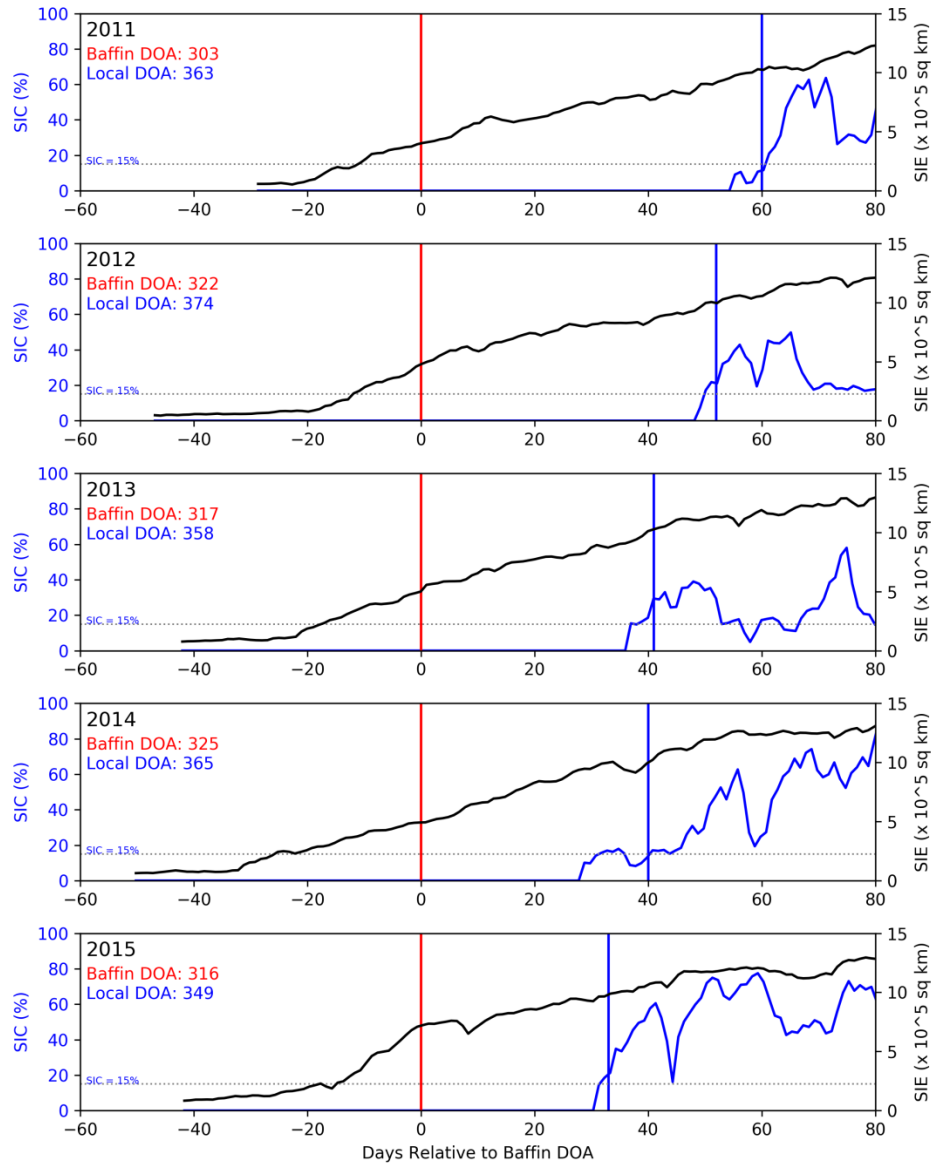

43

44 **Figure S3.** Time series of sea ice extent (SIE) for the Baffin Bay region (black) and mean sea ice concentration (SIC)  
 45 for the local domain, 66.5 to 67.5°N and 53 to 55°W (blue), relative to the Baffin-wide DOA (vertical red line) for  
 46 2011-2015. The vertical blue line shows the mean DOA for the local domain. The horizontal dotted line represents  
 47 the 15% SIC threshold used to identify the DOA.

48

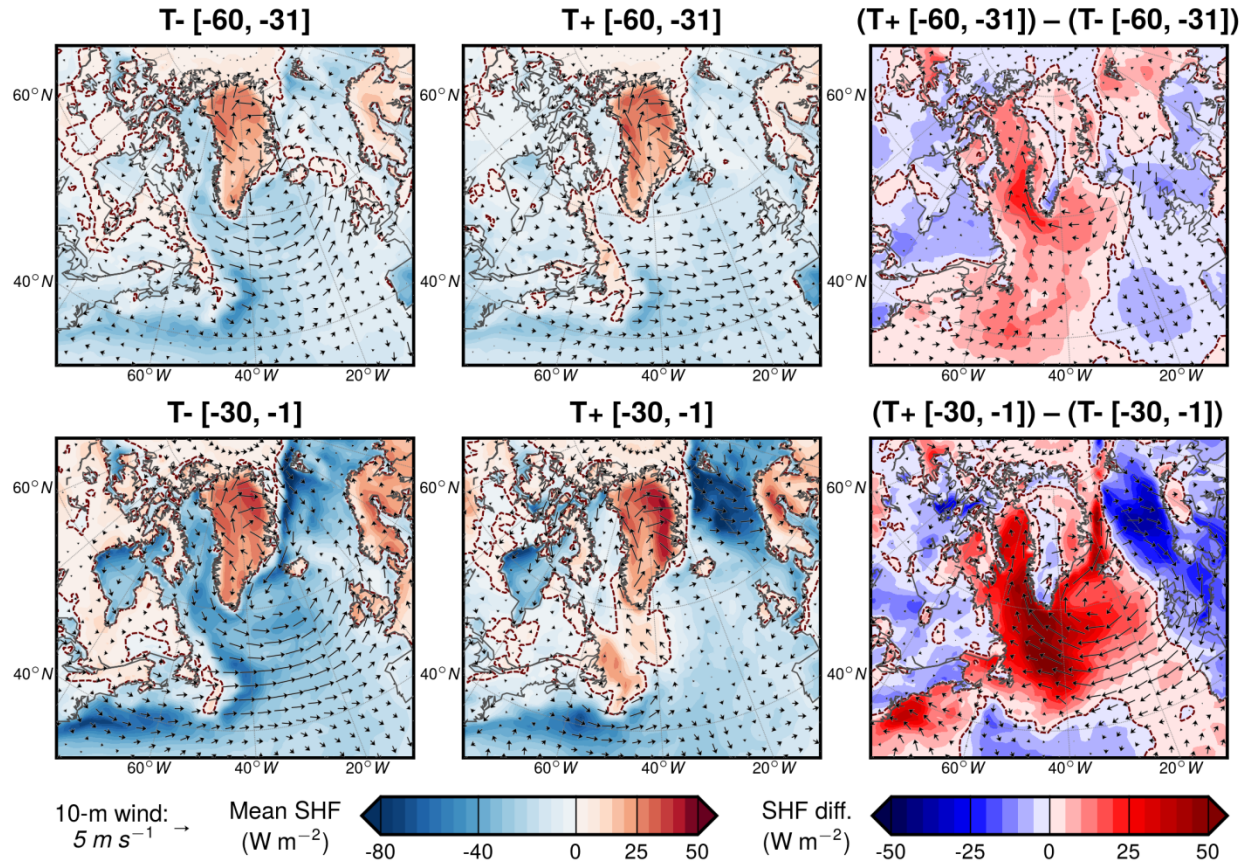

49

50 **Figure S4.** North Atlantic sensible heat flux (SHF) and 10-m wind composites for T+ and T- events at KAN\_B and  
 51 their differences for the two periods preceding DOA.

52

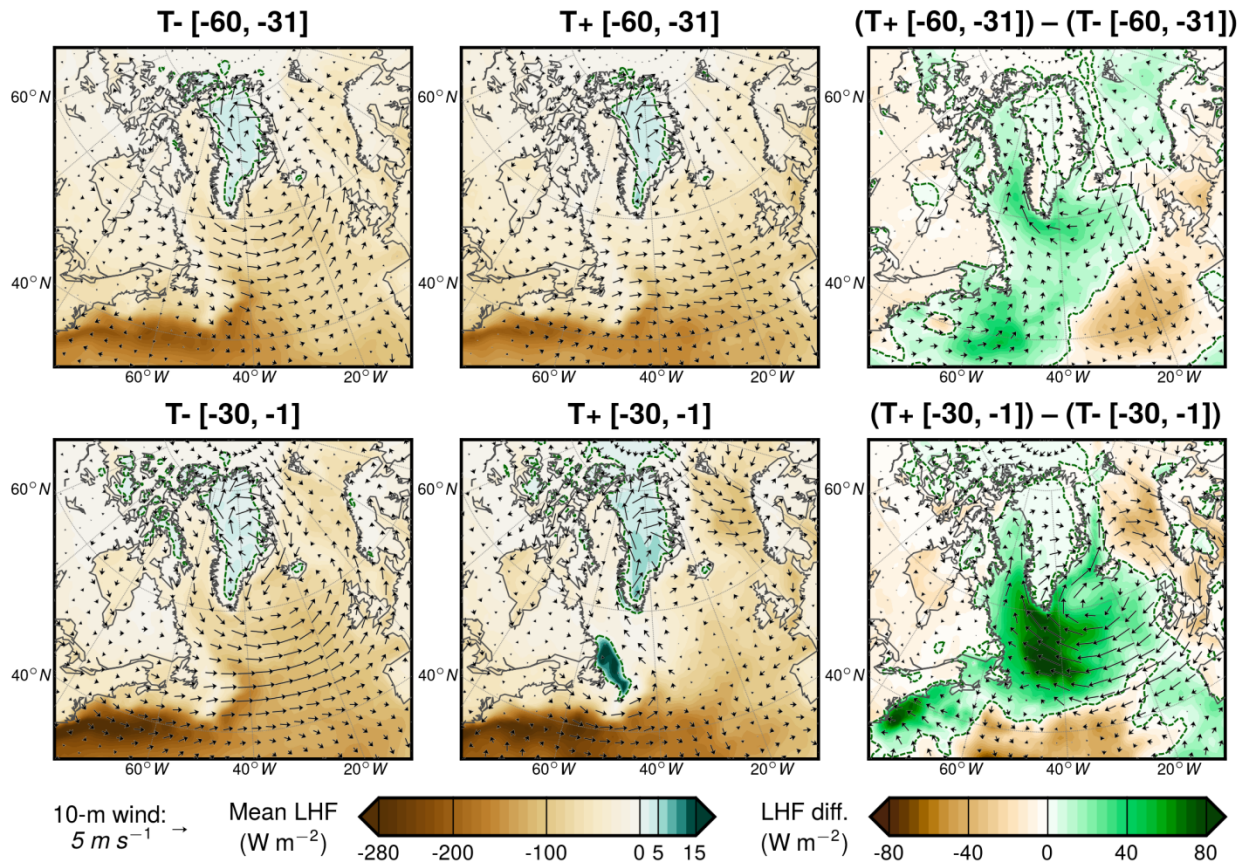

54

55 **Figure S5.** North Atlantic latent heat flux (LHF) and 10-m wind composites for T+ and T- events at KAN\_B and  
 56 their differences for the two periods preceding DOA.

57



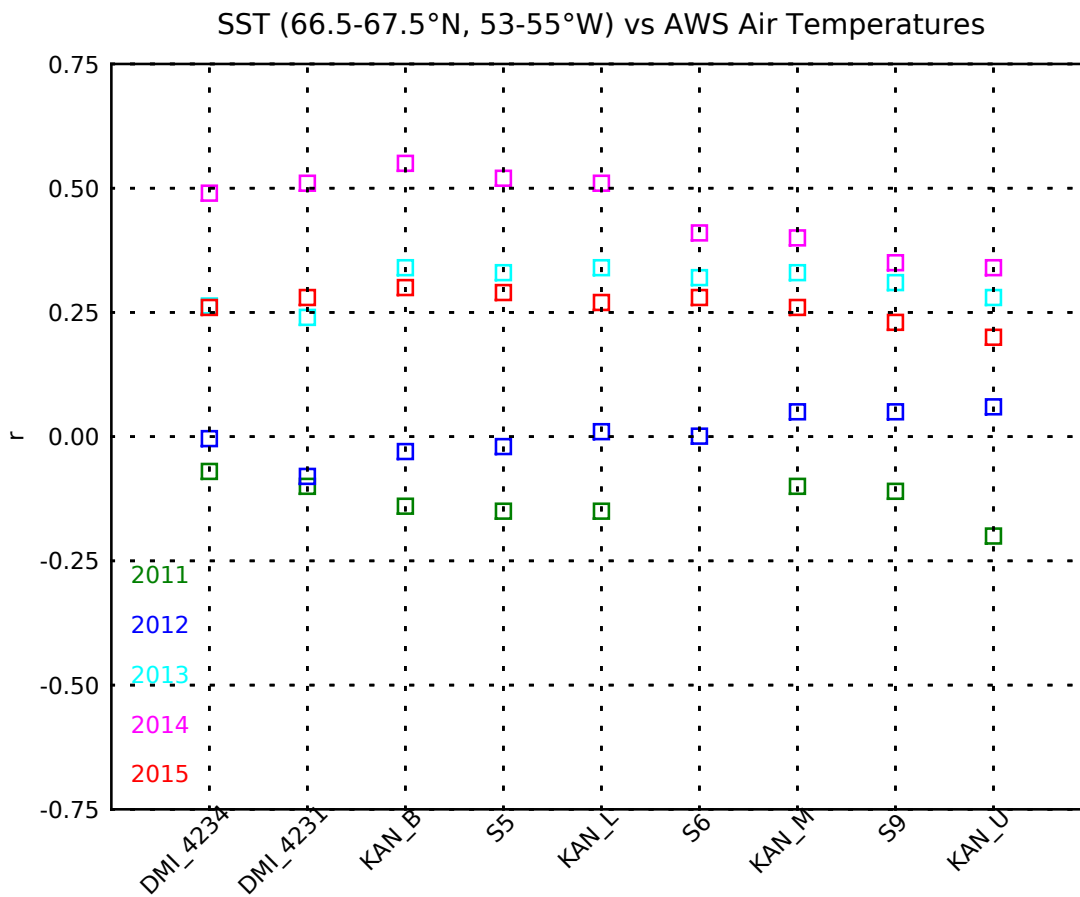

58  
59  
60  
61  
62  
63  
64  
65

**Figure S6.** Detrended Pearson ( $r$ ) correlation coefficients signaling intraseasonal fluctuations between DMI near-coastal or K-Transsect AWS air temperatures and SSTs surrounding Sisimiut (i.e. WMO code 4234). The SST product is described in Ballinger et al. (2018b) and DMI air temperatures are from Cappelen (2018, 2019, in review). The coefficients are calculated over the 60-day ( $D_{60}$  and  $D_{30}$ ) periods preceding DOA from 2011 to 2015 and  $p \leq 0.05$  for  $|r| \geq 0.26$ . The S6 coefficient for 2011 is missing due to an inadequate number of air temperature values. DMI\_4234 correlation coefficients overlap ( $r=0.26$ ) for 2013 and 2015.
